# Supplementary material
Source: publisher site journal article supplement (https://www.dovepress.com/article/303120)
Supplement: Supplementary file 1 [file get_supplementary_file.php]

**Supplemental Table S1. Baseline characteristics of pregnant patients with pPPROM comparing expectant management versus termination of pregnancy groups by hospital site.**

| Characteristics                                    | Site A<br>(n=60)                        | Site B<br>(n=39)                                       | p-value |
|----------------------------------------------------|-----------------------------------------|--------------------------------------------------------|---------|
| <b>Termination of Pregnancy (n=25)</b>             | 31.7%                                   | 15.4%                                                  | 0.070   |
| Maternal Age, mean years (SD)                      | 25 (7.1)                                | 31.4 (2.6)                                             | 0.044   |
| Nulliparous, %                                     | 21.1%                                   | 33.3%                                                  | 0.579   |
| Residence                                          |                                         |                                                        |         |
| Urban, %                                           | 42.1%                                   | 50%                                                    | 0.739   |
| Rural/Northern/Remote, %                           | 57.9%                                   | 50%                                                    |         |
| Prior History of Pregnancy Loss <sup>a,b</sup> , % | 75%                                     | 80%                                                    | 0.806   |
| Prior Preterm Birth <sup>b</sup> , %               | 16.7%                                   | 25%                                                    | 0.656   |
| GA at ROM, median [IQR]                            | 19 <sup>+3</sup> [17-21 <sup>+1</sup> ] | 20 <sup>+2</sup> [18 <sup>+4</sup> -22 <sup>+6</sup> ] | 0.280   |
| <b>Expectant Management (n=74<sup>c</sup>)</b>     | 68.3%                                   | 84.6%                                                  | 0.070   |
| Maternal Age, mean years (SD)                      | 30.1 (5.9)                              | 30.9 (5.1)                                             | 0.506   |
| Nulliparous, %                                     | 30.6%                                   | 30%                                                    | 0.952   |
| Residence                                          |                                         |                                                        |         |
| Urban, %                                           | 61%                                     | 57.6%                                                  | 0.769   |
| Rural/Northern/Remote, %                           | 39%                                     | 42.4%                                                  |         |
| Prior History of Pregnancy Loss <sup>a,b</sup> , % | 72.2%                                   | 78.1%                                                  | 0.530   |
| Prior Preterm Birth <sup>b</sup> , %               | 26.8%                                   | 36.3%                                                  | 0.383   |
| GA at ROM, median [IQR]                            | 20 <sup>+5</sup> [19-25 <sup>+2</sup> ] | 21 <sup>+3</sup> [19 <sup>+5</sup> -22 <sup>+6</sup> ] | 0.215   |

<sup>a</sup> Pregnancy loss defined as a composite of stillbirths plus abortions.

<sup>b</sup> Proportion calculated using only those with prior pregnancies.

<sup>c</sup> Sample size reflecting the exclusion of an additional 14 cases previously assigned to the expectant management subgroup following delivery <24 hours from membrane rupture.
